# Supplementary material for: Prokineticin Receptor-1 Signaling Inhibits Dose- and Time-Dependent Anthracycline-Induced Cardiovascular Toxicity Via Myocardial and Vascular Protection
Source: PubMed Central journal article supplement — JACC CardioOncol. 2019 Jul 10;1(1):84–102. doi: 10.1016/j.jaccao.2019.06.003 (PMC8352030; doi:10.1016/j.jaccao.2019.06.003), 2019-07-10

## Supplementary information

### **Prokineticin Receptor-1 Signaling Inhibits Dose- and Time-Dependent Anthracycline-Induced Cardiovascular Toxicity Via Myocardial and Vascular Protection**

Short title: PKR1 inhibits doxorubicin-induced cardiotoxicity

Adeline Gasser<sup>1</sup>, Yu-Wen Chen<sup>2</sup>, Anais Audebrand<sup>1</sup>, Ayhan Daglayan<sup>1</sup>, Marine Charavin<sup>1</sup>, Brigitte Escoubet<sup>3</sup>, Pavel Karpov<sup>4</sup>, Igor Tetko<sup>4</sup>, Michael W.Y. Chan<sup>5</sup>, Daniela Cardinale<sup>6</sup>, Laurent Désaubry<sup>1</sup>, Canan G. Nebigil<sup>1</sup>.

1. Laboratory of Cardio-oncology and medicinal Chemistry, CNRS (FRE2033), Illkirch, France
2. Institute of Biomedical Sciences, Academia Sinica, Taipei, Taiwan
3. FRIM UMS37, Hospital Bichat assistance public-Paris Hospital, University of Paris Diderot, PRES Paris Cité, DHU FIRE, Inserm U1138, Paris, France
4. Institute of Structural Biology, Helmholtz Zentrum München - German Research Center for Environmental Health (GmbH), Neuherberg, Germany.
5. Department of Biomedical Sciences, National Chung Cheng University, Chiayi, Taiwan
6. European Institute of Oncology, Milano, Italy

**Corresponding author:** Canan G. Nebigil

Laboratory of Cardio-oncology and Medicinal Chemistry, CNRS, FRE2033  
Ecole Supérieure de Biotechnologie de Strasbourg,  
300 boulevard Sebastien Brant, CS 10413,  
F - 67412 ILLKIRCH  
E-mails: [nebigil@unistra.fr](mailto:nebigil@unistra.fr)  
Tel: +33 368 85 47 56

## Methods

### Cells culture and treatments

H9c2 cardiomyocytes derived from embryonic rat heart was purchased from American Type Culture Collection (ATCC) (Rockville, MD, USA). Cardiomyocytes were isolated by the Percoll gradient technique as described previously (1). Cells were maintained in DMEM 4,5g/l, L-Glucose supplemented with 10% fetal bovine serum (FBS) and 1% penicillin/streptomycin. The cells were seeded on laminin-coated glassware's (10 µg/ml mouse laminin, Invitrogen) for 4 days then spontaneously beating cells were expose to IS20 (synthesized by Laurent Désaubry, Illkirch) or prokineticin-2 (PeproTech, 100-46) for 24h, before DOX (15 µM, Sigma-Aldrich, # 44583) treatment for an additional 4h.

Human Epicardial Progenitors Derived Cells were isolated from human heart right atrium appendage tissues or Tcf21 (CliniScience, aa151–179, # LS-C271190–200, 1/50 dilution) positive cells by FACS analyses as previously described (2). All experiments with human tissue specimens were carried out according to the official guidelines of the University of Strasbourg Medical Center with ethical approval from Comate de protection des personas “est. IV” with CPP n°IDRCB:2009-A01116-51-PRI 2009 HUS N°4603). Briefly, tissue explant was cut in small pieces (<1mm<sup>3</sup>) and, transferred in 1-2% gelatin pre-coated dish and cultured in a DMEM 4,5g/l; L-Glucose supplemented with 15% FCS/M199 1:1 and 1% penicillin/streptomycin for 3-4 days to induced cells outgrowths. When epicardial outgrowths were visible, the coverslips were removed. The cells were treated with DOX (0.1µM) in the presence of IS20 or vehicle for 24h and the outgrown cells were visualized by inverted microscopy and quantified.

Human aortic endothelial cells (HAEC) were obtained from ATCC. The cells were cultured in endothelial cell medium containing 10% FBS, and 1% endothelial cell growth factors and 1% penicillin and streptomycin. HAEC cells expressing PKR1 were seeded into 24 well culture plates coated with Matrigel (BD Bioscience, # 356231). Cells were pretreated with IS20 for 10 h, and then DOX (0.1 µM) for 14 h. The wells were imaged, and the tube numbers were quantified at 24h as previously described (3).

In some settings cells were pretreated with kinase inhibitors such as LY294002 (1µM, Sigma-Aldrich # 15447-36-6), PI3/Akt inhibitor, PD 98056 (1µM, Sigma-Aldrich # 167869-21-8), MAPK; or PKR1 agonist PC25 (30 nM, kindly provided by Laurent Désaubry) for 1h before IS20 treatments.

Breast cancer cell line, MDA-MB-231, MCF7, Kuramochi ovarian cancer cells (ATCC), was maintained in a 3:2 mixture of DMEM (Gibco) and F-12 (Gibco) supplemented with 10% FBS (Gibco) and 50 units/ml of P/S (Gibco). Cells were incubated at 37°C, under 5% CO<sub>2</sub>.

### siRNA transfections

siRNA for PKR1 utilized to down regulate PKR1 levels by 85% as previously described [18]. A universal siRNA non-targeted DNA sequence: sense: UUCUCCGAACGUGUCACGUdTdT; antisense:

ACGUGACACGUUCGGAGAAAdTdT) was used as negative control.

### **Western Blot assays**

After the treatments, cells or hearts were lysed in cold RIPA buffer (50mM TrisHCl pH7.4, 150mM NaCl, 2mM EDTA, 1% NP-40, 1,1% SDS) and centrifuged 10min at 14 000rpm 4°C to give protein extract. In some experinexperiments cytosolic or nuclear proteins were separated as previously described (4) . The concentration of protein was determined with BCA assay (Thermo Scientific) according manufacturer's instructions. About 10-30µg of protein per sample was load in SDS-PAGE electrophoresis and transferred to Whatman PVDF membrane. Membranes were probed with antibody against Phosphorylated-H2A.X (ser 139, Cell Signaling, #9718, 1/1000), phosphorylated-Akt (ser 473, #4058, 1/1000) and total-Akt (Cell Signaling, #9272, 1/1000), Nrf2 (Invitrogen, #PA5-27882, 1/1000), and GAPDH (Santa-Cruz, # sc-32233, 1/1000), vinculin (Cell Signaling, #4650, 1/5000). Membranes were treated with peroxidase-conjugated secondary antibodies (Santa-Cruz, 1/10000) and immunoreactivity was detected with an ECL Prime chemoluminescence detection kit (Amersham Pharmacia).

### **Cell viability**

Cell viability was evaluated using CyQUANT-NF proliferation kit (Invitrogen)(5). H9c2, cells were seeded at 10,000/well, in 96 wells plate in their completed medium 24h before the experiment. Cells were pretreated with IS20 in 1% serum medium for 10h and 1µmol/L of DOX for additional 14h (10nmol/L or 1000nmol/L). Then cell viability was determined on the supplier's protocol. Relative cell viability was then assessed, using a 96-well microplate reader (Thermo fisher) with absorbance set at 490 nM.

Appropriate 20,000 TNBC cells (MDA-MB 231) and MCF-7 breast cancer cells or Kuramochi ovarian cancer cells were seeded into 96-well plate 24h before the experiment. Cells were synchronized overnight in 1% serum medium and treated with various concentration of doxorubicin (DOX, Sigma) for 24h with or without IS20. Cell viability was determined using the Cell Counting Kit-8 (CCK-8, Sigma) according to the manufacturer's instructions. Relative cell numbers were then assessed, using a 96-well microplate reader (Thermo fisher) with absorbance set at 490 nM.

### **TUNEL and ROS assays**

Apoptosis was detected by Terminal deoxynucleotidyl transferase UTP Nick End Labeling (TUNEL, Apoptag fluorescein) method (Millipore, #S7110). For that, the cryosectioned tissues sections were fixed with 3.7% formaldehyde and permeablized by ethanol/acetic acid 2:1 (v/v) solution in -20°C. Then the sample was incubated in enzymatic solution for 1h at 37°C. During this, the terminal deoxynucleotidyltransferase catalyzes the addition of dUTP-associated digoxigenin on 3'OH free of DNA strand damage. Anti-digoxigenin antibody conjugated-fluorescein labelled the apoptosis positive cells in green; DAPI stained all nuclei cells in blue. Cells percentages were calculated for TUNEL-positive nuclei per total DAPI x100 in 10 randomly selected fields of each condition (n=3) and expressed as a percentage of the total number of nuclei (6).

Intracellular ROS production was measured in the H9c2 cell lines or primary cardiomyocytes using 2', 7'-dicholorodihydrofluorescein diacetate (DCFDA) ROS

detection assay kit (Abcam, # ab113851) according to manufactures guidance.  $1 \times 10^4$  cells were seeded in a clear bottom black 96-well plates and allowed for attachment overnight in medium containing 10% FBS at 37°C in a 5% CO<sub>2</sub> incubator. Cells were then starved in the medium with 1%FBS for 10 h followed by IS20 treatment for additional 14h. Cells were washed and loaded with 25mM of DCFDA for 45 min at 37°C and exposed to DOX (1, 5, 10 or 15  $\mu$ M) for 3h for the peak ROS accumulation. At the end of treatment period, fluorescence intensity was measured at Ex/Em, 485/535 nm using Fluoskan AscentFluorescan Reader (Thermo SCIENTIFIC). In some settings the cells were costained with mitoTracer and DCFDA for 45min and then ROS production in mitochondria was visualized using confocal microscopy.

### **Immunostaining analyses**

Immunofluorescence assay was performed on cryosectioned hearts and cells (7). They were fixed with 3,7% formaldehyde and blocked with blocking buffer (from MOM kit ®VECTOR or 10% Donkey serum, 0,5% Triton 100X). The samples were probed with antibody, targeting  $\alpha$ -SMA (Abcam, A7811, 1/500 dilution), calponin (Abcam, ab151427, 1/500 dilution), PECAM (Santa Cruz, sc-18916, 1/500 dilution), caspase-3 (Santa Cruz, sc-373730, 1/500), MF20-MHC (Hybridoma Bank, Iowa City, Iowa, 1/250 dilution), Nrf2 (Santa Cruz, # sc722, 1/500 dilution) and tcf21 (Abcam, (#ab329821, 1/250 dilution), phosphorylated-Akt (ser 473, Cell signaling #4075, 1/500). After, they were treated with second antibody conjugated with specific fluorochromes (e.g., Alexa 488, Alexa 555 or Fluorescein, Santa-Cruz, 1/500 dilution). Nuclei were stained with DAPI. The fluorescence signal was detected, and intensity was captured with Leica TCSNT fluorescent microscope. Signal intensity was quantified on digitalized-images and calculated as the product of averaged pixel intensity per high-power field (HPF) or per DAPI positive total nucleus number. The images were controlled by Image J software. The laser was chosen according to the sample. It was compared pixel intensity and pixel distribution after background intensity was subtracted.

cTnT levels were performed on serum, respectively as described (8,9).

### **Mice models of cardiotoxicity**

All animal experiments were performed under using protocols approved by the Direction des Services Vétérinaires du Bas-Rhin, France (Authorization N° B67-274) and the French (APAFIS#4708) and European regulation-approved protocols from Directive 2010/63/EU of the European Parliament on the protection of animals used for scientific purposes (EU0064). The animal experimentation and housing were conducted at the accredited animal experimentation and housing facility of the Institut de Recherche de l'Ecole de Biotechnologie de Strasbourg (Register number: C67-218-19).

For the chronic model, 10-week-old male C57BL/6J mice (total of at least 10 per group, Janvier Labs) were administrated serial DOX injections as previously described (5) with modifications. Mice were intra peritoneally (i.p.) injected with DOX (5 mg/kg; Sigma-Aldrich) once a week for 3 consecutive weeks (weeks 1–3). After one week of interval, they received again DOX for 4 weeks (weeks 5–8). Selection of IS20 dose and route of administration were based on a previous study (6). IS20 (1mg/kg, IP) was administrated daily (week 1) for 8 weeks. Vehicle-only treated animals were used as controls (0.1% DMSO in phosphate-buffered saline). Animals were randomly assigned.

Echocardiography was performed week 9 after the initial DOX injection by one operator blind for treatment. Anesthesia and analyzes were identical to those used in the acute model. Animals were euthanized after echocardiography, and hearts were excised, weighted and cryopreserved or included in cryomatrix for histology analysis. All animal experiments were carried out in accordance with current institutional guidelines for the care and use of experimental animals. All efforts were made to minimize suffering with respect to the regulation concerning genetically manipulation of organisms.

### ***In vivo* Tumorigenicity assay**

10-week-old, athymic nude mice (BALB/cByJNarl) were purchased from the National Laboratory Animal Center, Taiwan. All mice were kept under specific pathogen-free conditions, using a laminar airflow rack, with free access to sterilized food and autoclaved water. All experiments were approved by the Animal Experimentation Ethics Committee of National Chung Cheng University, Taiwan (IACUC No. 1060501).  $5 \times 10^6$  of MDA-MB-231 breast cancer cells were resuspended in 0.15mL of 3:1 mixture of medium and Matrigel (BD Bioscience) and then injected subcutaneously into both side of the flank of each mouse. After tumor growth to a volume of around 20mm<sup>3</sup>, mice (n=12) for each group) were administered intra-peritoneal with DMSO (control), DOX (5mg/kg, twice per week for two weeks) or DOX + IS20 (1mg/kg, every day after DOX is given). Tumor size was measured daily with calipers in length (L) and width (W). Tumor volumes were calculated using the formula  $(L \times W^2/2)$ . At the end of experiment, all mice were sacrificed by cervical dislocation

### **Histological and electron microscopy analyses**

For histology, hearts were removed from mice, dissected, and frozen for cryosectioning (5-10  $\mu$ m), and the sections were stained with Mallory tetrachrome coloration (VWR Chemical)(6,10). The heart sections were analyzed under binocular LEICA MZ95 or microscope LEICA DME X10 magnifications connected with PROGRES C5 camera (JENOPTIK). For electron microscopy, hearts were fixed in 4% paraformaldehyde, 1.5% glutaraldehyde in 0.1mol/L Cacodylate buffer. The hearts were then sliced longitudinally into 2 pieces for continued immersion fixation in the same fixative and embedded in epoxy resin, using routine methods (11).

### **Echocardiography and MRI assessment**

Echocardiography was performed on lightly anesthetized animals ( $\approx 1\%$  Isoflurane in O<sub>2</sub>) with Vevo 2100 ultrasound machine (Visualsonics, Canada) equipped with a linear 22-55 MHz or 9-18 Mz transducer using a rail system to hold animal and probe. ECG and body temperature were monitored, and temperature maintained with a heating pad. LV imaging was obtained from a long-axis view for two-dimensional guided M-mode imaging and posterior wall tissue Doppler measurements and apical 4- to 5-chamber view for Doppler mitral and LV out flow assessment as well as tissue Doppler measurements at mitral annulus (10). End diastole was identified from ECG as the onset of QRS and end systole as the end of ECG T wave. Fractional shortening (FS) was computed from left ventricle diameters as:  $FS = ((LVEDD - LVESD)/LVEDD) * 100$ . Where LVEDD is LV end-diastolic diameter and LVESD is LV end-systolic diameter. The mean velocity of circumferential fiber shortening ( $V_{cfc}$ ) was corrected for heart rate as follows:  $V_{cfc} = FS/ET_c$

(ejection time). Echocardiographic acquisitions at M Mode used to calculate cardiac output (CO) (ml/min) = (LVEDD<sup>3</sup> -LVESD<sup>3</sup>) \* heart rate) (Tournoux, et al, 2011).

MRI was performed Anesthesia was induced with a 2% mixture of isoflurane. The mouse forelimbs were fitted with pediatric ECG leads. ECG were monitored with an SAI Model 1025 monitoring and gating system (Small Animal Instruments, Inc., Stony Brook, NY). A black blood gradient echo sequence for multiphase cardiac MRI of the mouse heart was implemented on a Biospec 70/20 MR scanner (Bruker, Germany). A gradient echo pulse sequence was used to acquire data with TE/TR 1.72/61 ms, a matrix of 128 128 zero-filled to 256 256, a field of view of 3\*3 cm, a slice thickness of 0.5 mm, flip angle 30°, and 8 frames. For black blood imaging, a nonselective/selective combination of 180° pulses (double inversion recovery (IR)) was used. A 50 ms square sinc pulse was used for selective second inversion. The %EF were calculated, utilizing the formula (DV-SV/DV\*100).

### **Gene expression analysis**

Total RNA from mice hearts or cells was isolated with TRIZOL Reagent (Life Technologies) and the concentrations were measured by nanoview. Minimums of 3 mice hearts or cell samples for each of groups were analyzed in each experiment. Retrotranscription and real time quantitative polymerase chain reaction (qPCR) was performed using GAPDH as an internal control and SYBR Green system with MyiQ cyclor (Biorad). The primers used, and programs are shown in Table 1. All data of threshold Cycle (Ct) were normalized by Ct of house-keeping gene (GAPDH)(7).

### ***In silico* predictions of toxicity and degradation of IS20**

Median lethal dose (LD<sub>50</sub>), Lowest Effect Level (LEL) for intra peritoneal toxicity and half-life of IS20 in mouse were assessed, utilizing a model based on RTECS (Registry of Toxic Effects dataset), described on On-line Chemical Database and Modeling Environment platform (OCHEM) <http://ochem.eu>. These models were developed using the default hyper-parameters of neural networks based on diverse sets of descriptors available at the OCHEM as previously described. The applicability domain of models was also estimated. The n-fold cross-validation results were used to identify the models with the highest prediction power.

### **Statistical analysis**

Data are expressed as mean ± standard error of the mean (SEM), except murine experimental data that are shown as mean ± standard deviation (SD). Statistical comparisons for TUNEL PECAM-1, Calponin, α-SMA, and flk-1 staining on 40 heart cryosections obtained from 4 mice were performed using a one-way analysis of variance (ANOVA) with alpha-correction for pairwise comparisons using Tukey's method. Kaplan-Meier survival analysis (log-rank) was performed for 2 groups comparisons. Statistical analysis for the murine experimental data were conducted by using GraphPad Prism software version 6.0 (GraphPad Software, La Jolla, California).

**Table 1. Primers for RT-qPCR**

| <b>Gene</b>                           | <b>Primers</b>     | <b>Sequence (5' -3')</b>                            |
|---------------------------------------|--------------------|-----------------------------------------------------|
| <b>Mouse ANF</b>                      | Forward<br>Reverse | CCTGTGTACAGTGCGGTGTC<br>CCTGCTTCCTCAGTCTGCTC        |
| <b>Mouse Col1A1</b>                   | Forward<br>Reverse | GCCAAGAAGACATCCCTGAAG<br>TGTGGCAGATACAGATCAAGC      |
| <b>Mouse BNP</b>                      | Forward<br>Reverse | AAGTCCTAGCCAGTCTCCAGA<br>GAGCTGTCTCTGGGCCATTTTC     |
| <b>Mouse <math>\beta</math>-actin</b> | Forward<br>Reverse | GAGACCTTCAACACCCC<br>GTGGTGGTGAAGCTGTAGCC           |
| <b>Mouse TNF-<math>\alpha</math></b>  | Forward<br>Reverse | TTCATCAGTTCTATGGCCC<br>GGGAGTAGACAAGGTACAAC         |
| <b>Mouse SERCA2a</b>                  | Forward<br>Reverse | TGTGTAATGCCCTCAACAG<br>CCCCACGAGCCAGATATTCTC        |
| <b>Mouse RYR2</b>                     | Forward<br>Reverse | GGATGAATGTCTCACTGTCC<br>CTTAATGTGGCTTCCACTCC        |
| <b>Mouse PLB</b>                      | Forward<br>Reverse | CTGTGACGATCACCGAAGC<br>TGGTCAAGAGAAAGATAAAAAGTTGA   |
| <b>Rat Bcl2</b>                       | Forward<br>Reverse | ATCGTCTGTGGATGACTGAGTAC<br>AGAGACAGCCAGGAGAAATCAAAC |
| <b>Rat Bax</b>                        | Forward<br>Reverse | AGGGTGGCTGGGAAGGC<br>TGAGCGAGGCGGTGAGG              |
| <b>Mouse Bcl2</b>                     | Forward<br>Reverse | GACAGAAGATCATGCCGTCC<br>GGTACCAATGGCACTTCAAG        |
| <b>Mouse Bax</b>                      | Forward<br>Reverse | CTGAGCTGACCTTGGAGC<br>GACTCCAGCCACAAAGATG           |
| <b>Human HSP70</b>                    | Forward<br>Reverse | TGTTTGTCTTTGAGGTGGAC<br>AAGAATTCTAATGAACATATCGGTTG  |
| <b>Human <math>\beta</math>-actin</b> | Forward<br>Reverse | GCGAGAAGATGACCCAGAT<br>GAGGCGTACAGGGATAGC           |
| <b>Rat <math>\beta</math>-actin</b>   | Forward<br>Reverse | ATCTGGCACCACACCTTC<br>AGCCAGGTCCAGACGCA             |
| <b>Human Bcl2</b>                     | Forward<br>Reverse | GATGTGATGCCTCTGCGAAG<br>CATGCTGATGTCTCTGGAATCT      |
| <b>Human Bax</b>                      | Forward<br>Reverse | CAGTGACCTGCGCTGTGGTA<br>CGGAGGAAGTCCAATGTC          |
| <b>Rat nrf2</b>                       | Forward<br>Reverse | TTTGTAGATGACCATGAGTCGC<br>GTCCTGCTGTATGCTGCTT       |
| <b>Rat GCLc</b>                       | Forward<br>Reverse | CCACTGTCCAAGGTTGACGA<br>CTTGCTACACCCATCCACCA        |
| <b>Rat NQO1</b>                       | Forward<br>Reverse | GGCCATCATTGGGCAAGTC<br>TCCTTGTGGAACAAAGGCGA         |
| <b>Rat HO-1</b>                       | Forward<br>Reverse | TCTGCAGGGGAGAATCTTGC<br>TTGGTGAGGGAAATGTGCCA        |

## FIGURES

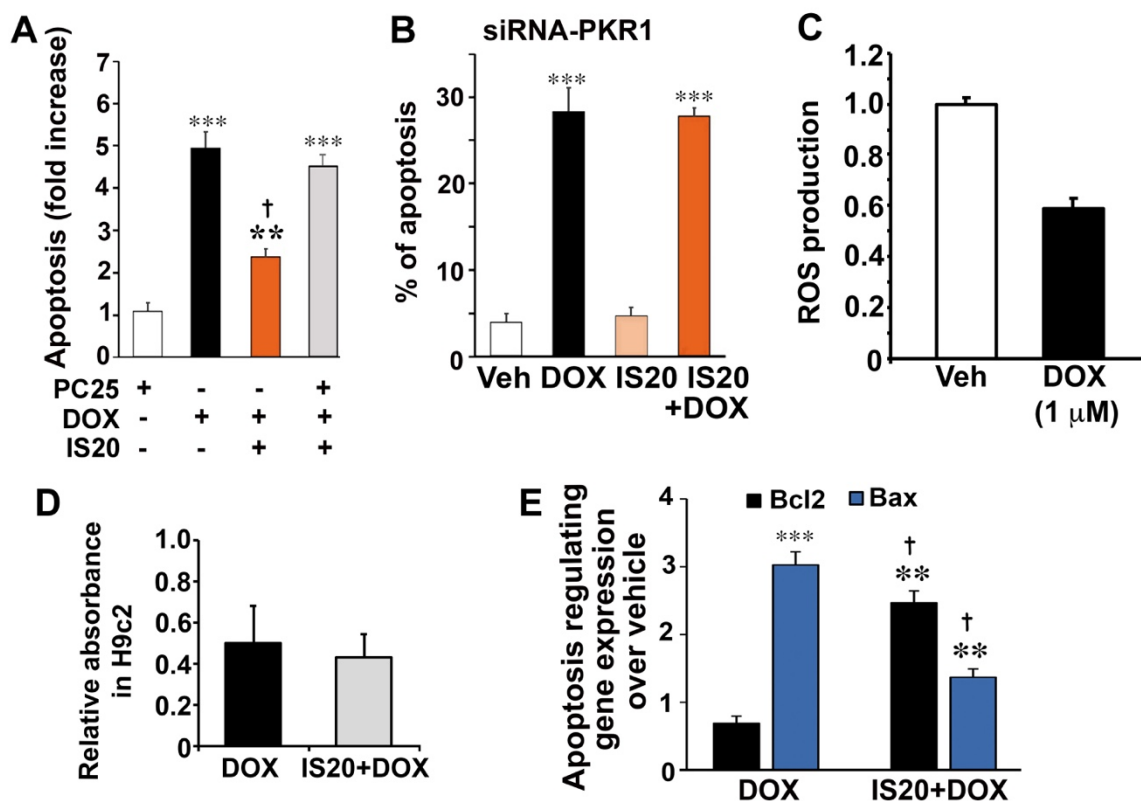

**Figure S1.** **A)** IS20 (10nM, 10h) inhibits DOX (1 $\mu$ M, 14h)-mediated apoptosis in H9c2 cells that was reversed by in the presence of PKR1 antagonist PC25 (30nM). **B)** IS20 (10nM, 10h) cannot inhibit DOX (1 $\mu$ M, 14h)-mediated apoptosis in H9c2 cells where PKR1 is downregulated by siRNA-PKR1. 250-300 cells were analyzed across three independent experiments. \*  $p < 0.05$  vs. vehicle, \*\*  $p < 0.05$  vs DOX. **C)** H9c2 cell were treated as in A for detection of ROS production, using ROS detection kit according to manufactures protocol. **D)** Spectrofluorometric measurements (maximum excitation wavelength of 493 nm and a maximum emission wavelength of 592 nm) to detect the cellular uptake of DOX in the absence and presence of IS20. **E)** QPCR analyses of apoptotic gene expression (Bcl2/Bax) over vehicle. Data are presented as the mean  $\pm$  SEM. \*  $p < 0.05$  vs. vehicle, \*\*  $p < 0.05$  vs DOX  $n=4$ , ANOVA test).



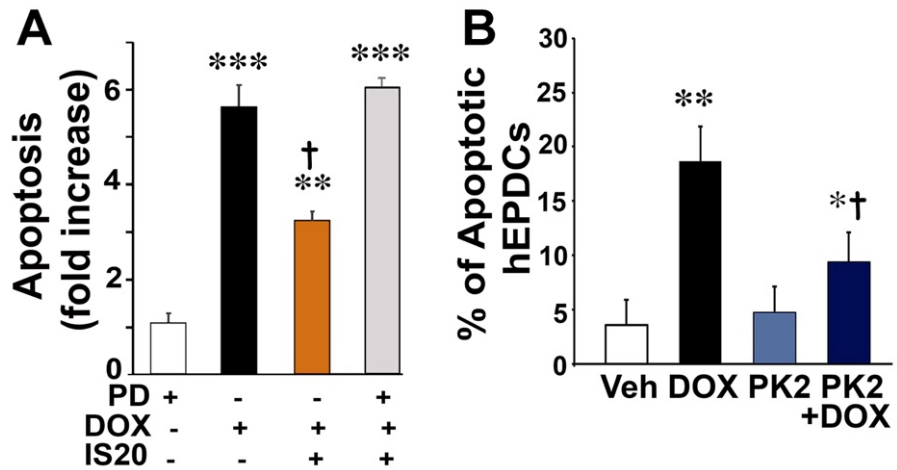

**Figure S2.** A) IS20 (10nM, 10h) was not able to inhibit apoptosis induced by DOX (1 $\mu$ M, 14h) in the presence of MAPK inhibitor PD 98056 (1 $\mu$ M, 1h before IS20) in HAECs. B) Prokineticin-2 was able to inhibit apoptosis induced by DOX in hEPDCs. 250-400 cells were analyzed across three independent experiments. Data are presented as mean $\pm$  SEM. \* p < 0.05, \*\* p < 0.01 and \*\*\* p < 0.001 vs. vehicle, t p < 0.05 vs. DOX,

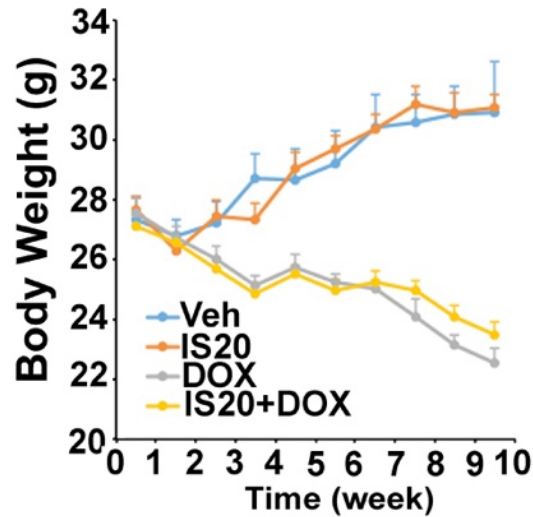

**Figure S3.** Body weight evaluation among the indicated group of mice.

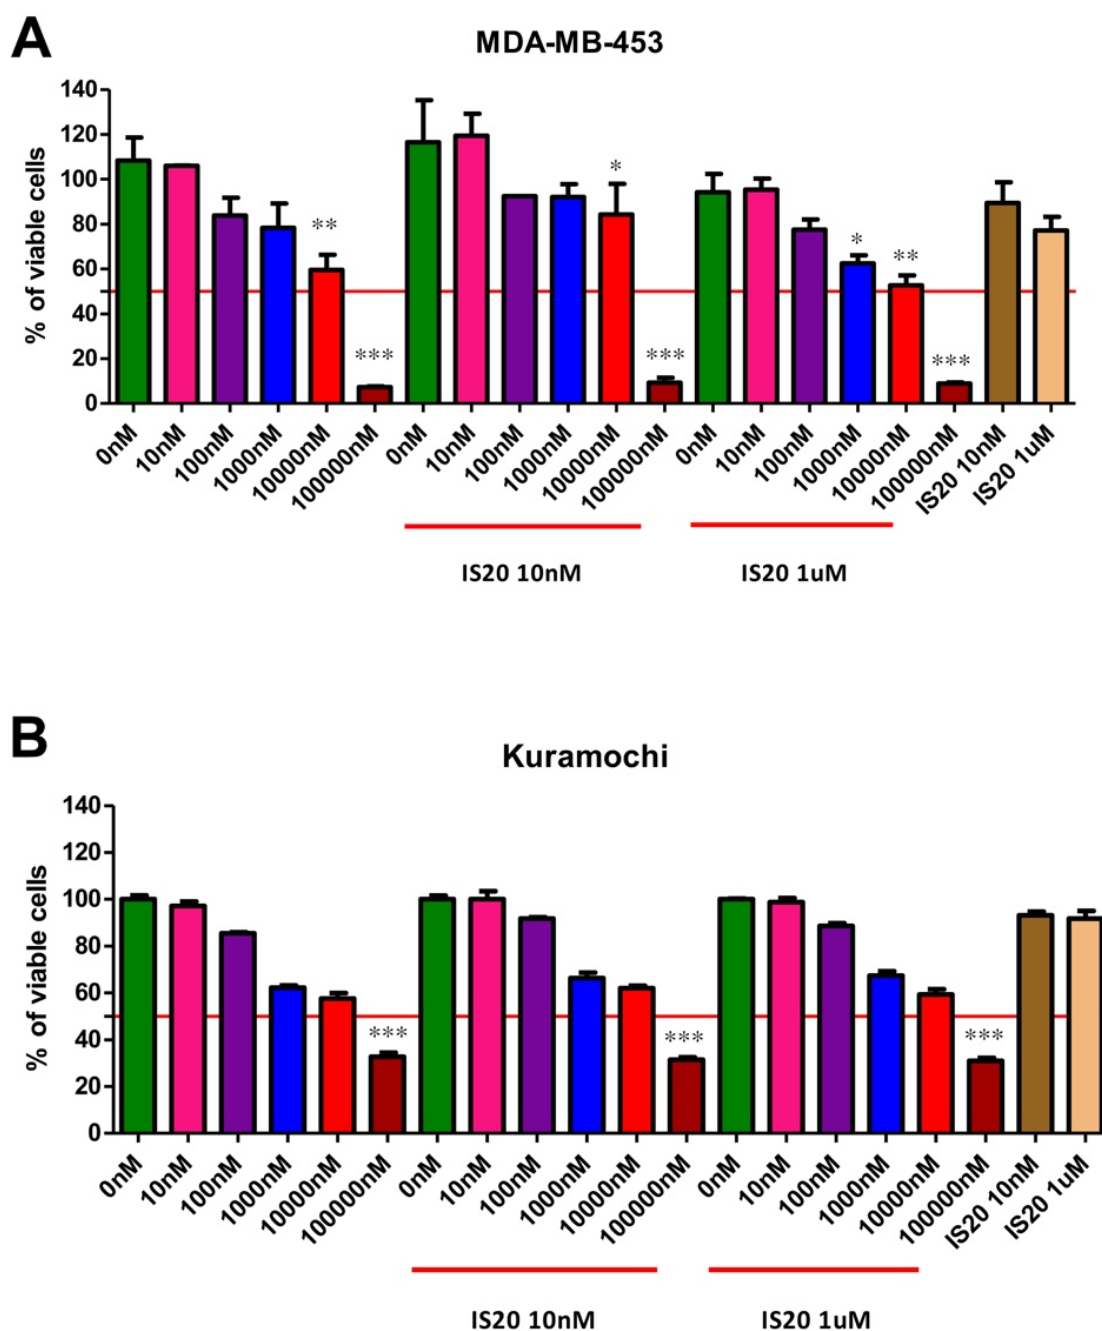

**Figure S4.** Cell viability assay on **A)** MDA-MB 453 breast cancer and **B)** Kuramochi ovarian cancer cells treated with different concentration of DOX (10nM-100 $\mu$ M) in the presence or absence of IS20 (10nM or 1 $\mu$ M). Data are presented as mean $\pm$  SEM. \*  $p < 0.05$ , \*\*  $p < 0.01$  and \*\*\*  $p < 0.001$  vs. vehicle.

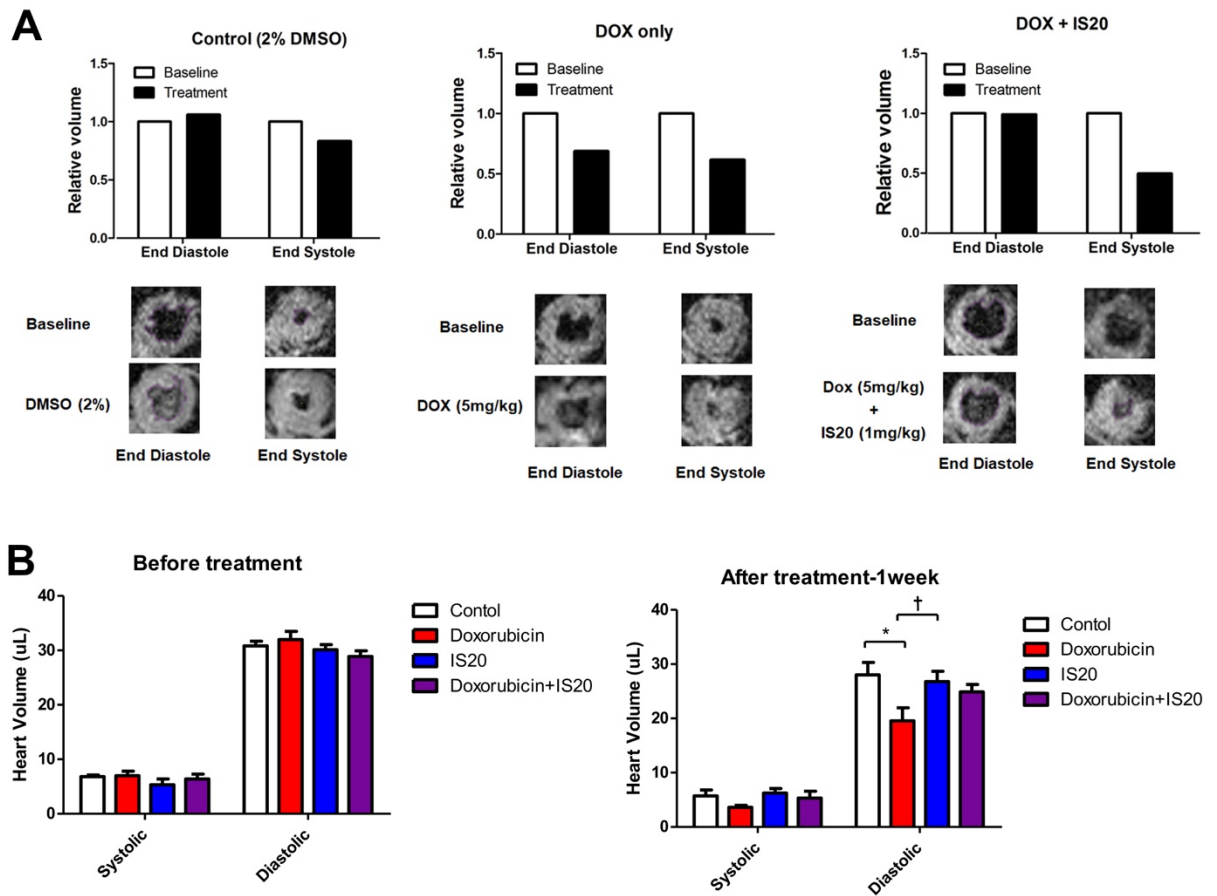

**Figure S5. A)** MRI analyses of the hearts of the mice treated with vehicle (left), DOX-only (middle) and IS20 in the presence of DOX (right). **B)** Quantitative MRI analyses on heart volume during systole and diastole before treatments and 1 week after treatments.  $n = 6$ , multivariate ANOVA test. IS20, PRK1 agonist; PRK1, prokineticin receptor 1; DOX, doxorubicin. Data are expressed as mean  $\pm$  SD. \*  $p < 0.05$  vs. vehicle, †  $p < 0.05$  vs. DOX,

## References

1. Qureshi R, Yildirim O, Gasser A et al. FL3, a Synthetic Flavagline and Ligand of Prohibitins, Protects Cardiomyocytes via STAT3 from Doxorubicin Toxicity. *PLoS One* 2015;10:e0141826.
2. van Tuyn J, Atsma DE, Winter EM et al. Epicardial cells of human adults can undergo an epithelial-to-mesenchymal transition and obtain characteristics of smooth muscle cells in vitro. *Stem Cells* 2007;25:271-8.
3. Guilini C, Urayama K, Turkeri G et al. Divergent roles of prokineticin receptors in the endothelial cells: angiogenesis and fenestration. *Am J Physiol Heart Circ Physiol* 2010;298:H844-52.
4. Qureshi R, Kindo M, Boulberdaa M, von Hunolstein J-J, Steenman M, Nebigil CG. A Prokineticin-Driven Epigenetic Switch Regulates Human Epicardial Cell Stemness and Fate. *Stem Cells (Durham, NC, U S)* 2018;36:1589-1602.
5. Jay SM, Murthy AC, Hawkins JF et al. An engineered bivalent neuregulin protects against doxorubicin-induced cardiotoxicity with reduced proneoplastic potential. *Circulation* 2013;128:152-61.
6. Gasser A, Brogi S, Urayama K et al. Discovery and cardioprotective effects of the first non-Peptide agonists of the G protein-coupled prokineticin receptor-1. *PLoS One* 2015;10:e0121027.
7. Arora H, Boulberdaa M, Qureshi R et al. Prokineticin receptor-1 signaling promotes Epicardial to Mesenchymal Transition during heart development. *Sci Rep* 2016;6:25541.
8. Nebigil CG, Jaffre F, Messaddeq N et al. Overexpression of the serotonin 5-HT2B receptor in heart leads to abnormal mitochondrial function and cardiac hypertrophy. *Circulation* 2003;107:3223-9.
9. Boulberdaa M, Turkeri G, Urayama K et al. Genetic inactivation of prokineticin receptor-1 leads to heart and kidney disorders. *Arterioscler Thromb Vasc Biol* 2011;31:842-50.
10. Parlakian A, Charvet C, Escoubet B et al. Temporally controlled onset of dilated cardiomyopathy through disruption of the SRF gene in adult heart. *Circulation* 2005;112:2930-9.
11. Urayama K, Guilini C, Turkeri G et al. Prokineticin receptor-1 induces neovascularization and epicardial-derived progenitor cell differentiation. *Arterioscler Thromb Vasc Biol* 2008;28:841-9.

## Annex

### Source of Data

Figure 1D. H2AX Phosphorylation by DOX

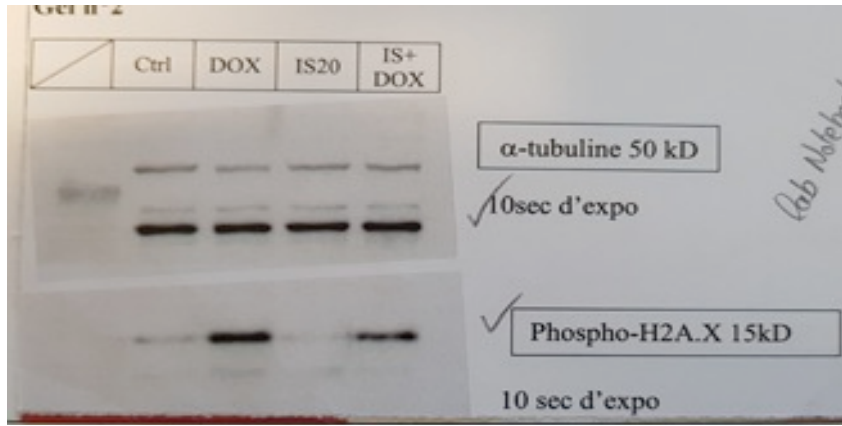

Fig1G. Activation of Akt (56kDa) by different concentration (nM) of IS20 in cardiomyocytes.

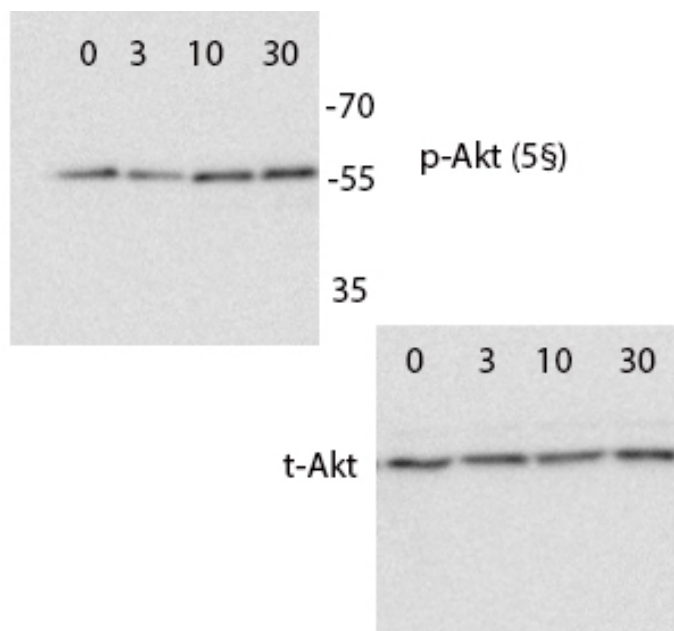

Fig2C: WB for Nrf2 (61 kDa) on proteins derived from Nuclear extracts

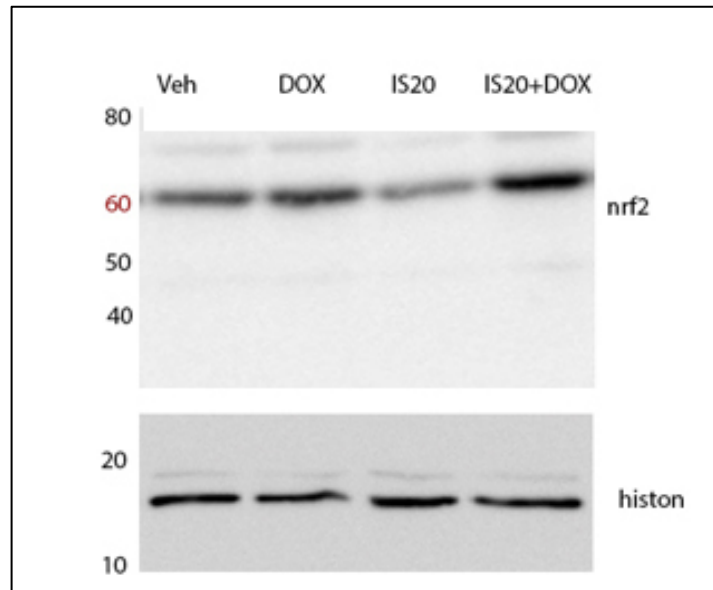

Fig2C WB for Nrf2 (60kDa) on protein derived from cytoplasmic extract

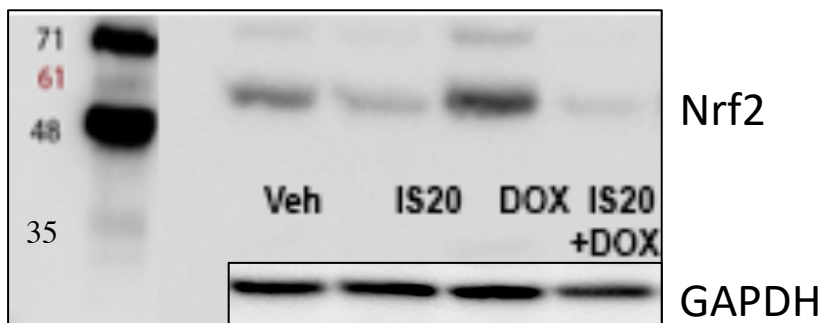

Fig 3B Western Blot analyses: Different concentration of IS20 (0,3,56, 10, 30 nM) mediated phosphorylation of ERK1 (42 kDa) and ERK2 (44kDa) (left), normalized by total ERK (right).

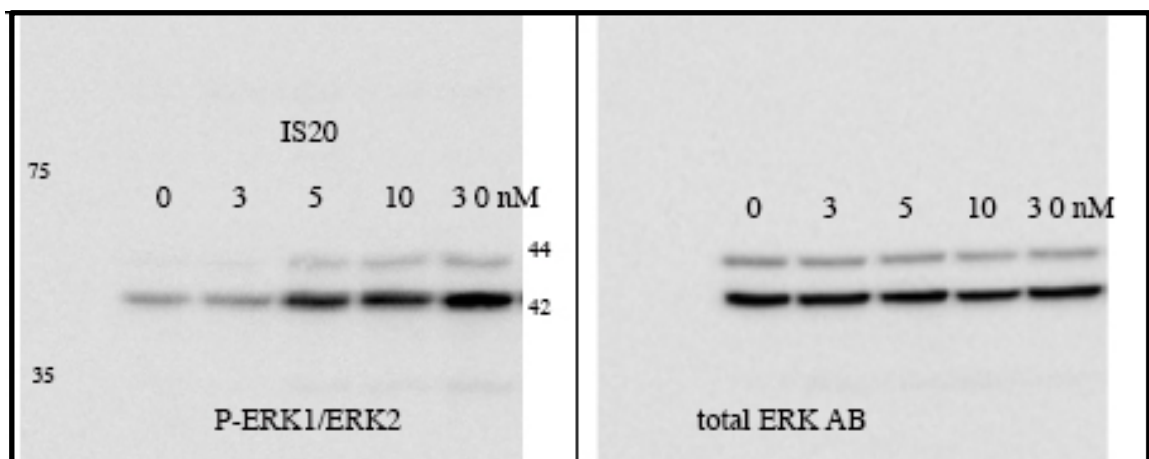

Fig 4A. Akt phosphorylation in the mice hearts

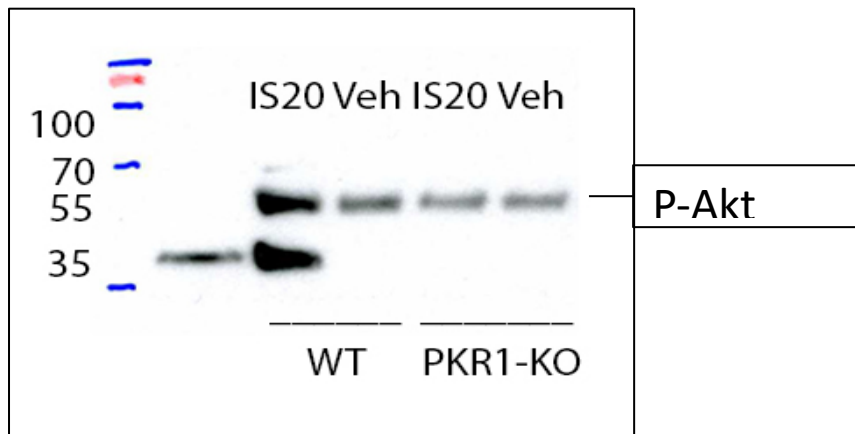

Fig 5A. H2AX phosphorylation in the mice hearts

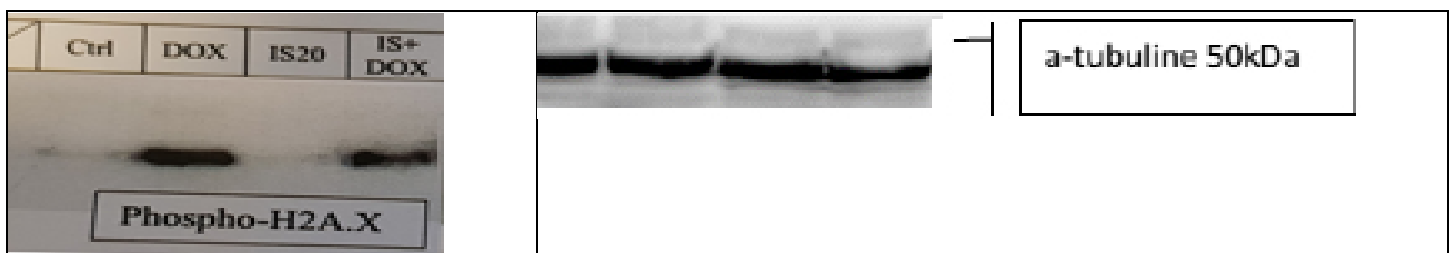

Supplement: mmc1.pdf [file mmc1.pdf]
